# Supplementary material for: Electrochemical detection of Alzheimer's disease related substances in biofluids by silica nanochannel membrane modified glassy carbon electrodes
Source: Royal Society of Chemistry journal article supplement (doi:10.1039/c8an01457d), 2018-01-01
Supplement: c8an01457d1.pdf [file c8an01457d1.pdf]

Supporting Information

# **Electrochemical Detection of Alzheimer's Disease Related Substances in Biofluids by Silica Nanochannel Membrane Modified Glassy Carbon Electrodes**

Lin Zhou, Hao Ding, Fei Yan, Weiliang Guo and Bin Su\*

*Institute of Analytical Chemistry, Department of Chemistry, Zhejiang University, Hangzhou, 310058, China*

## **Table of Contents**

- S1. SNM/GCE Preparation
- S2. SEM Characterization
- S3. Electrochemistry Characterization
- S4. Stripping Analysis of Cu<sup>2+</sup>
- S5. Voltammetry Analysis of DA
- S6. DA Analysis by ECL-Intensity Mode
- S7. DA Analysis by ECL-Image Mode
- S8. Stability
- S9. Biofluid Analysis
- S10. Analytical data compared with previous works

## S1. SNM/GCE Preparation

The preparation of SNM/GCE involved the following steps:

- APTES was electrografted on the GCE surface as the molecular glue between GCE and SNM to improve the mechanical stability of prepared SNM.
- SNM/GCE with surfactants (designated as SMs@SNM/GCE) was prepared using the Electro-Assisted Self-Assembly (EASA) method.
- SNM/GCE with open channels was obtained by immersing the electrode in 0.1 M HCl ethanol solution for 15 min.

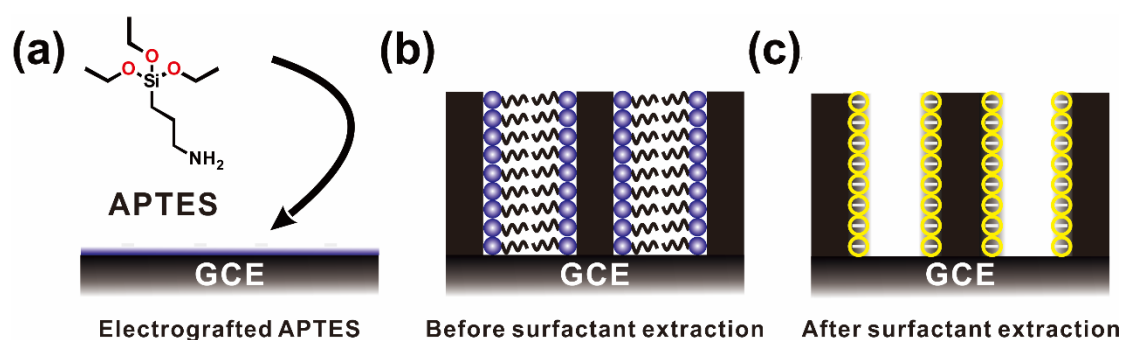

**Scheme S1** Illustration of preparation of SNM/GCE

## S2. SEM Characterization

**Fig. S1a** shows the top-view SEM image of the newly polished GCE surface. It is clear that the surface is pretty smooth. After electrografting with APTES, some white particles were generated on the GCE surface, which was mostly generated by hydrolyzation of APTES under air conditions (**Fig. S1b**). After further growing SNM on the surface, some bigger particles were generated on the top surface of SNM (**Fig. S1c**). As reported previously,<sup>s1</sup> these particles are most likely silica nanoparticle byproducts.

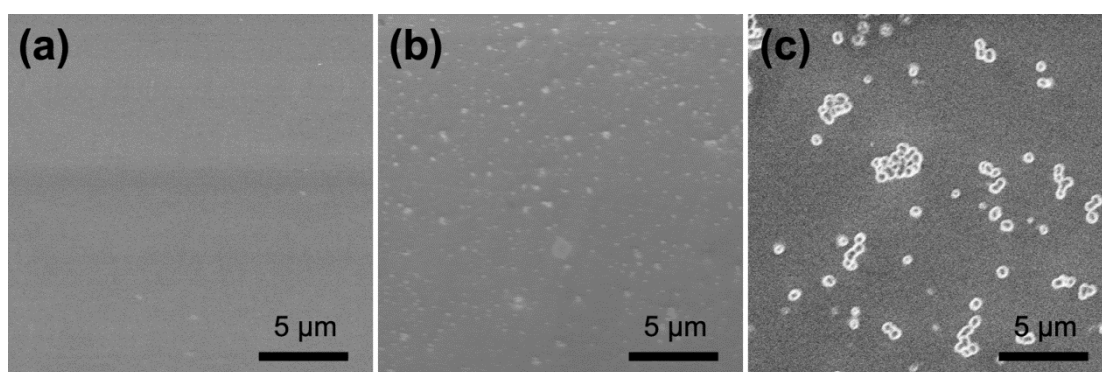

**Fig. S1.** Top-view SEM images of GCE (a), GCE electrografted with APTES (APTES/GCE) (b) and SNM/GCE (c).

### S3. Electrochemistry Characterization

**Fig. S2** shows CVs of  $\text{Ru}(\text{NH}_3)_6^{3+}$  obtained with a bare GCE, SNM/GCE with surfactants (SMs@SNM/GCE) and SNM/GCE.

Given the surfactants formed micelles inside nanochannels, the hydrophobic cores of micelles could blocked the access and mass transport of hydrophilic, charged  $\text{Ru}(\text{NH}_3)_6^{3+}$  from bulk solution to underlying GCE surface, yielding a featureless capacitive current (black curve). This response also indicated that the as-prepared SNM was compact without leakage or cracks.

After excluding the surfactants from SNM, the redox reaction of  $\text{Ru}(\text{NH}_3)_6^{3+}$  at the SNM/GCE yielded a CV similar to the bare GCE (blue and red curves), indicating the SNM was highly permeable. Considering the effective electrode surface area was decreased by roughly 80%, a comparable current magnitude suggested the enhanced mass transport of  $\text{Ru}(\text{NH}_3)_6^{3+}$  at the SNM/GCE.

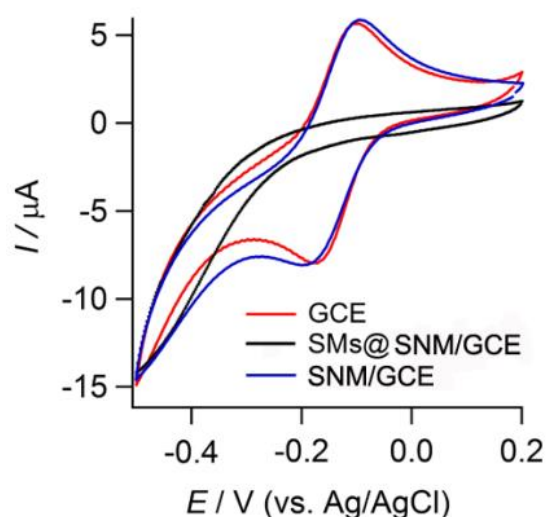

**Fig. S2** CVs obtained at the GCE, SNM/GCE with surfactants (designated as SMs@SNM/GCE) and SNM/GCE in 0.1 M KCl containing 0.5 mM  $\text{Ru}(\text{NH}_3)_6\text{Cl}_3$ . The scan rate was 100 mV/s.

#### S4. Stripping Analysis of $\text{Cu}^{2+}$

We believe the negatively charged surface of SNM can electrostatically enrich  $\text{Cu}^{2+}$ . The solution pH and electrodeposition time were firstly optimized to obtain a sensitive analysis.

As shown in **Fig. S3a**, the stripping current reached the maximum at a pH ranging from 6.0 to 8.0. Note that at an even higher pH silica is not stable and at a lower pH the electrostatic interaction is weak.

As seen from **Fig. S3b**, the stripping current sharply increased with increasing the electrodeposition time from 0 to 300 s and eventually reached a plateau beyond 300 s.

Therefore, the optimal pH and electrodeposition time was set to 6.0 and 300 s, respectively, for the stripping analysis of  $\text{Cu}^{2+}$ .

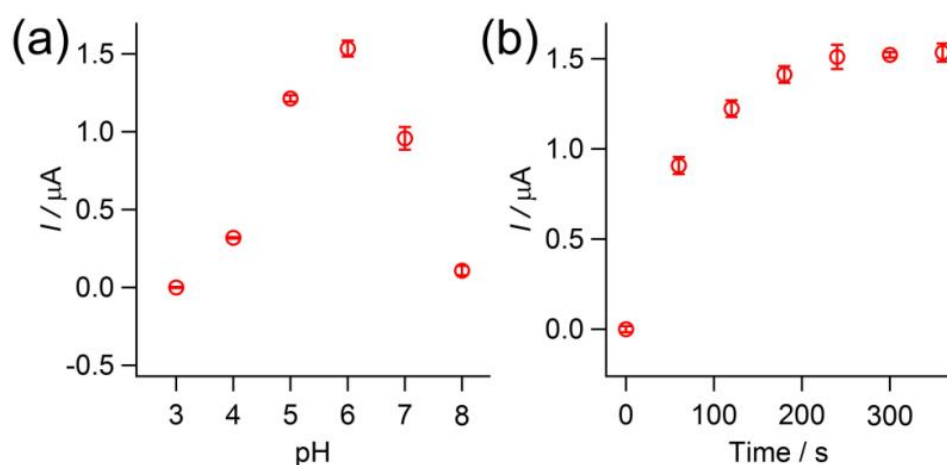

**Fig. S3** The effect of solution pH (a) and electrodeposition time (b) on the stripping current signals for the detection of  $1.0 \mu\text{M Cu}^{2+}$  using the SNM/GCE.

## S5. Voltammetry Analysis of DA

**Fig. S4a** shows the CVs of DA at the SNM/GCE in 0.1 M PBS at different pH. Apparently, the current wave shifted negatively with increasing the solution pH. **Fig. S4b** shows the dependence of anodic peak potential on the solution pH, yielding a slope of  $-0.061$  V/pH and suggesting a proton-coupled electron transfer process by a proton/electron ratio of 1.

**Fig. S4c** shows the variation of oxidation peak current at different pH. A maximum current magnitude was observed at pH 6.0. **Fig. S5** shows that the peak currents linearly increase with the square root of scan rate in the range from 10 to 500  $\text{mV s}^{-1}$ , suggesting a diffusion controlled process.

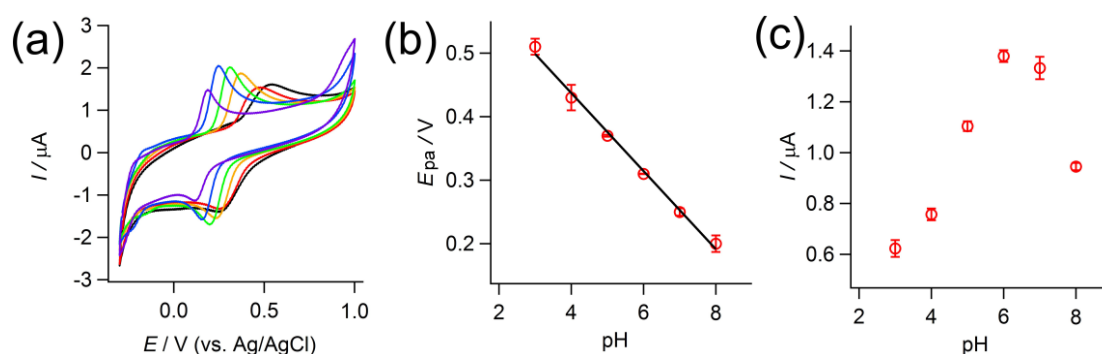

**Fig. S4** (a) CVs obtained at a SNM/GCE in 0.1 M PBS containing 50  $\mu\text{M}$  DA at different pH values. (b) The calibration curve of the oxidation peak potential with pH. The straight line corresponds to a linear fitting with a slope of 0.061 V/pH. (c) The oxidation peak current obtained at the SNM/GCE with 50  $\mu\text{M}$  DA in 0.1 M PBS at different pH.

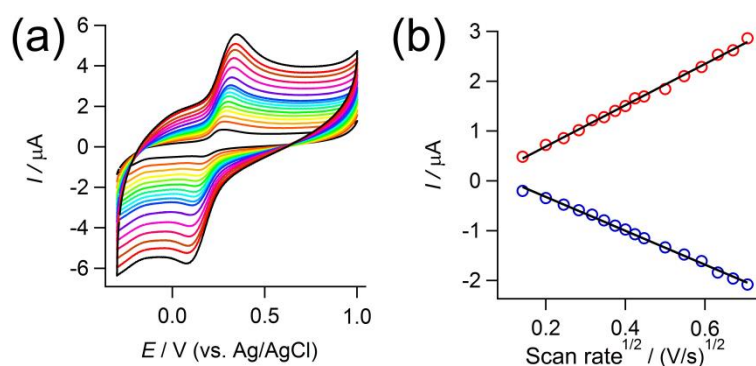

**Fig. S5** (a) CVs obtained at the SNM/GCE at different scan rates (10  $\text{mV/s}$  to 500  $\text{mV/s}$ ) in 0.1 M PBS containing 50  $\mu\text{M}$  DA. (b) The dependence of peak current currents on the square root of scan rate.

## S6. DA Analysis by ECL-Intensity Mode

### S6.1 Optimal $\text{Ru}(\text{bpy})_3^{2+}$ and TPrA Concentrations

ECL analysis of DA was performed in two different modes.

The intensity mode was carried out by measuring the variation of ECL intensity of  $\text{Ru}(\text{bpy})_3^{2+}$ /TPrA system in the presence of DA. DA has been reported to be a quencher of this ECL reaction system.

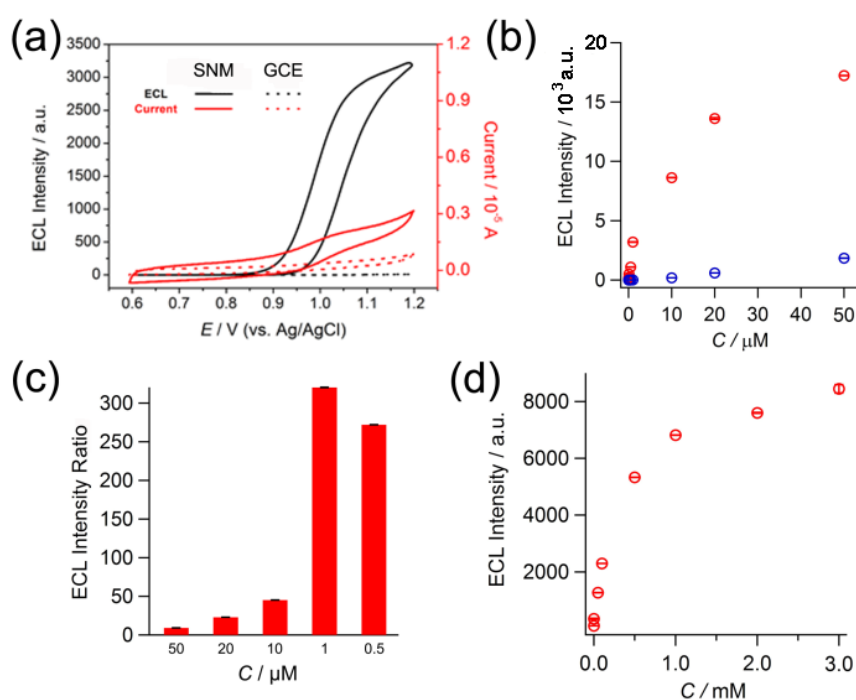

**Fig. S6** (a) CVs (red) and ECL-voltage curves (black) recorded in 0.1 M PBS (pH 6.0) containing  $1 \mu\text{M}$   $\text{Ru}(\text{bpy})_3^{2+}$  and 3 mM TPrA at the SNM/GCE (solid line) and GCE (dotted line). The potential scan rate was 100 mV/s. (b) Dependence of ECL intensity on the concentration of  $\text{Ru}(\text{bpy})_3^{2+}$  at the SNM/GCE (red) and GCE (blue). The solution was 0.1 M PBS (pH 6.0) containing 3 mM TPrA. (c) The magnification of ECL intensity at various concentrations of  $\text{Ru}(\text{bpy})_3^{2+}$  (ECL intensity ratio was  $\text{ECL}_{\text{SNM/GCE}}/\text{ECL}_{\text{GCE}}$ ). The solution was 0.1 M PBS (pH 6.0) containing 3 mM TPrA. (d) Dependence of ECL intensity on the concentration of TPrA at the SNM/GCE. The solution was 0.1 M PBS (pH 6.0) containing  $10 \mu\text{M}$   $\text{Ru}(\text{bpy})_3^{2+}$ . In all cases, the PMT voltage was biased at 450 V.

The ECL generation by  $\text{Ru}(\text{bpy})_3^{2+}$ /TPrA at the SNM/GCE was firstly studied. As shown in **Fig. S6a**, when the potential was swept beyond +0.9 V, an obvious ECL signal could be observed. In 0.1 M PBS (pH 6.0) containing  $1 \mu\text{M}$   $\text{Ru}(\text{bpy})_3^{2+}$  and 3 mM TPrA, the

ECL intensity obtained at the SNM/GCE was 320 times larger than GCE. This enhancement can be most likely ascribed to the electrostatic effect of negatively charged surface of SNM.

**Fig. S6b** compares the ECL intensity generated at the SNM/GCE and GCE for different concentrations of  $\text{Ru}(\text{bpy})_3^{2+}$  when the solution contained a constant excess amount of TPrA (namely 3 mM). Apparently, the ECL intensity increased with increasing the concentration of  $\text{Ru}(\text{bpy})_3^{2+}$  in both cases. Moreover, the overall ECL intensity at the SNM/GCE was much higher than GCE. **Fig. S6c** illustrates the ratio of ECL intensities measured at two electrodes, which can be defined as the ECL enhancement factor. It can be seen that when the concentration of  $\text{Ru}(\text{bpy})_3^{2+}$  was 1  $\mu\text{M}$  the enhancement factor reached the maximum, namely 320. However, at this concentration the absolute ECL intensity detected at the SNM/GCE was not high enough, therefore a concentration of 10  $\mu\text{M}$  was used in the analysis of DA.

**Fig. S6d** displays the variation of ECL intensity with the concentration of TPrA in the presence of 10  $\mu\text{M}$   $\text{Ru}(\text{bpy})_3^{2+}$ . The ECL intensity increased sharply when the concentration of TPrA was lower than 1 mM and slowly above 1 mM. Considering a high concentration of TPrA might increase the background noise, the concentration of TPrA was fixed at 1 mM in the analysis of DA.



## S6.2 Optimal Solution pH for Double-Potential Step ECL Measurements

The ECL reaction of  $\text{Ru}(\text{bpy})_3^{2+}/\text{TPrA}$  system is also dependent on pH. A higher pH favors the generation of TPrA radical species and thus results in a higher ECL intensity. However, **Fig. S4** shows that at a higher pH the oxidation current of DA decreases, because the oxidation-polymerization of DA occurs.

**Fig. S7a** compares the ECL intensities of SNM/GCE at different pH in the absence and presence of  $1.0 \mu\text{M}$  DA. Apparently, the presence of DA leads to the decrease of ECL intensity. We define here the quenching ratio as,

$$r_q = \frac{I_{\text{absence}} - I_{\text{presence}}}{I_{\text{absence}}} \quad (\text{S1})$$

where  $I_{\text{absence}}$  and  $I_{\text{presence}}$  denote the ECL intensity in the absence and presence of DA. As shown in **Fig. S7b**, a maximum  $r_q$  of 33% was obtained at pH 7.0. In other words, the addition of DA leads to a decrease of ECL intensity to 67% of its initial value. Therefore, the solution pH was controlled at 7.0 for the analysis of DA in the double-potential step measurement (see **Fig. 4** in the manuscript).

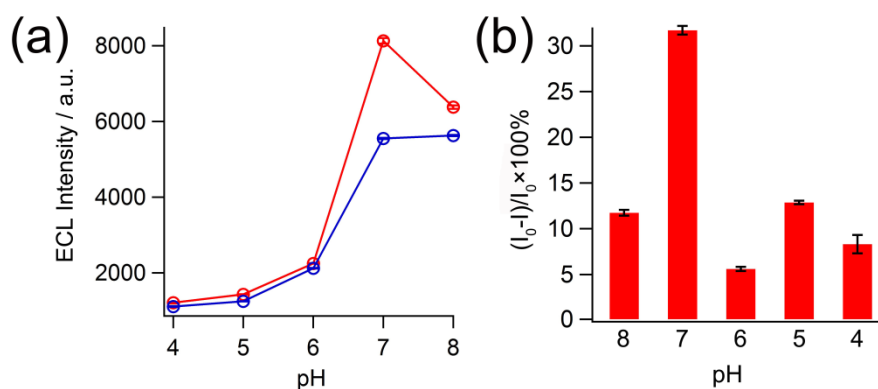

**Fig. S7** (a) pH effect on the ECL intensity of SNM/GCE in the absence (red) and presence (blue) of  $1.0 \mu\text{M}$  DA. The solution was  $0.1 \text{ M}$  PBS at different pH. The concentration of  $\text{Ru}(\text{bpy})_3\text{Cl}_2$  and TPrA was  $10 \mu\text{M}$  and  $1 \text{ mM}$ . The PMT voltage was biased at  $450 \text{ V}$ . (b) The ECL quenching ratio of DA at the SNM/GCE.

## S7. DA Analysis by ECL-Image Mode

**Fig. S8** compares the ECL images of SNM/GCE and GCE captured at different potentials. At the SNM/GCE, bright image appeared at a potential more positive than +1.0 V, at which the GCE remained dark until the potential was beyond +1.2 V, indicating a higher sensitivity of the former electrode. This is similar to that observed in the intensity mode.

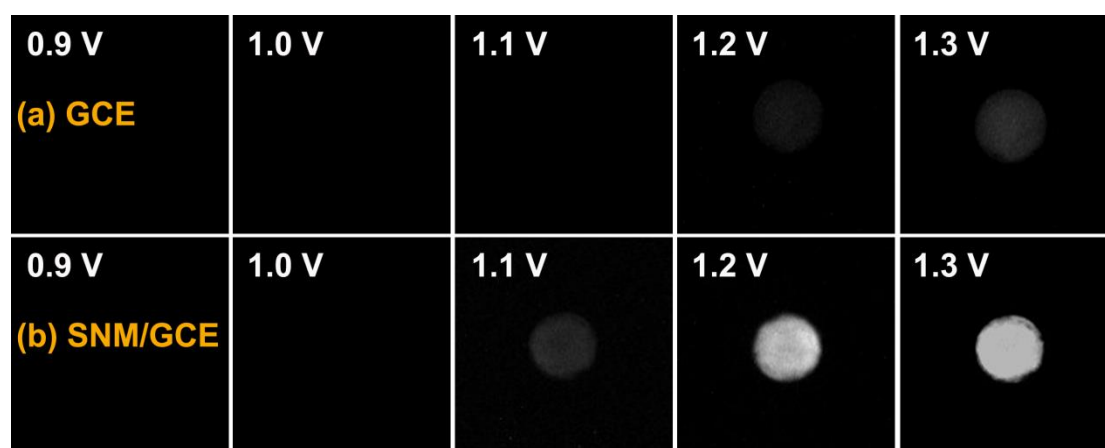

**Fig. S8** ECL images obtained at GCE (a) and SNM/GCE (b) at different potentials in the course of potential scanning from +1.0 to +1.3 V. The scan rate was  $0.1 \text{ V s}^{-1}$  and the CCD exposure time was 12 s.

## S8. Stability

**Fig. S9** illustrates the current values of SNM/GCE in the detection of  $\text{Cu}^{2+}$  and DA using stripping voltammetry and DPV for ten times. Apparently, the current is pretty stable with a variation less than 10%, indicating the electrode is can be repeatedly used with a satisfied stability.

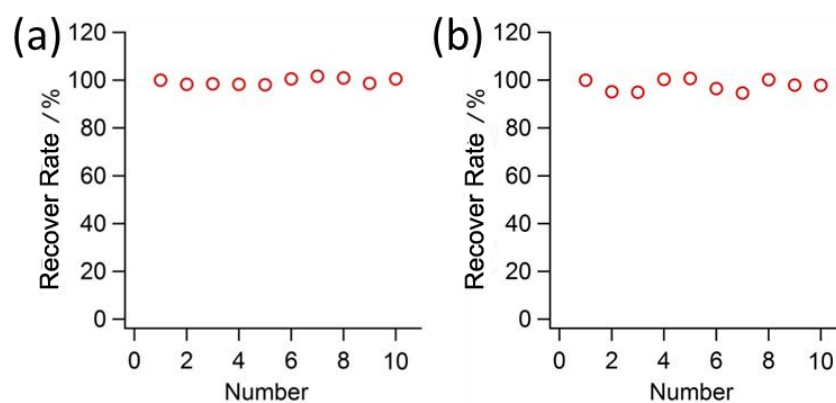

**Fig. S9** The reusability of SNM/GCE in the detection of 1  $\mu\text{M}$   $\text{Cu}^{2+}$  by stripping voltammetry (a) and 50  $\mu\text{M}$  DA by DPV (b). The initial current in the first detection is set as 100 %.

## S9. Biofluid Analysis

### S9.1 Detection of DA in ACSF

Fig. S10 and S11 compare DPV curves and ECL intensity curves obtained at the SNM/GCE and GCE in ACSF containing different amount of DA.

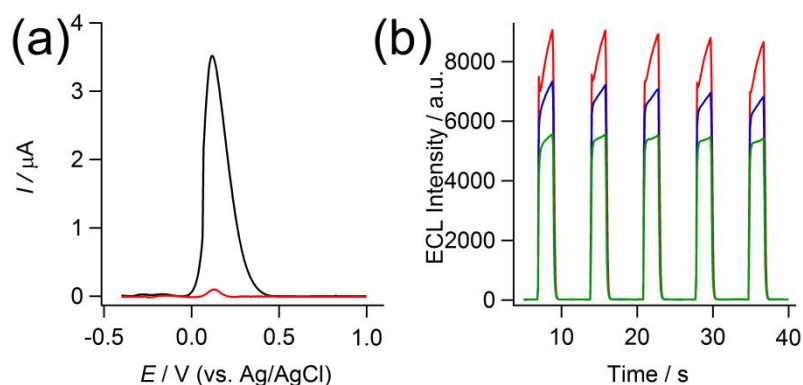

**Fig. S10** (a) DPV curves of SNM/GCE in ACSF containing 200 nM DA (red line) and 50  $\mu\text{M}$  DA (black line). (b) ECL intensity of SNM/GCE in ACSF in the absence (red) and presence of 30 nM DA (blue line) and 1  $\mu\text{M}$  DA (green line). The concentration of  $\text{Ru}(\text{bpy})_3^{2+}$  and TPrA was 10  $\mu\text{M}$  and 1 mM, respectively. The PMT voltage was biased at 450 V.

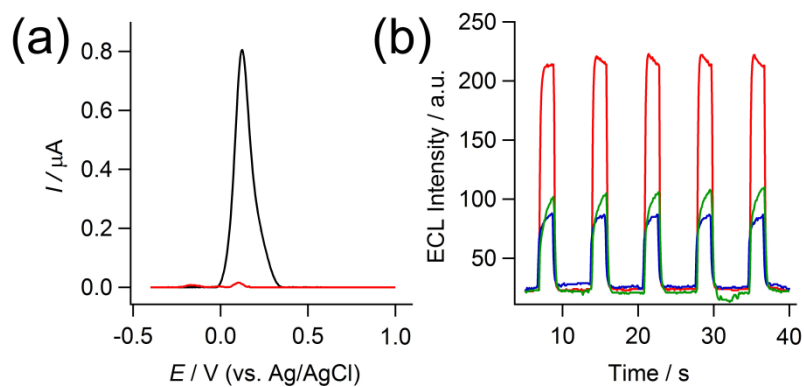

**Fig. S11** (a) DPV curves of GCE in ACSF containing 200 nM DA (red line) and 50  $\mu\text{M}$  DA (black line). (b) ECL intensity of GCE in ACSF in the absence (red) and presence of 30 nM DA (blue line) and 1  $\mu\text{M}$  DA (green line). The concentration of  $\text{Ru}(\text{bpy})_3^{2+}$  and TPrA was 10  $\mu\text{M}$  and 1 mM, respectively. The PMT voltage was biased at 450 V.

### S9.3 Detection of DA in HB

**Fig. S12** compares the DPV responses obtained at SNM/GCE and GCE in HB containing 40  $\mu\text{M}$  DA. A sharp DA response is obtained at the SNM/GCE. Owing to severe surface befouling, only a broad peak is observed at the GCE (the broad peak might also include signals of other redox species, such as UA).

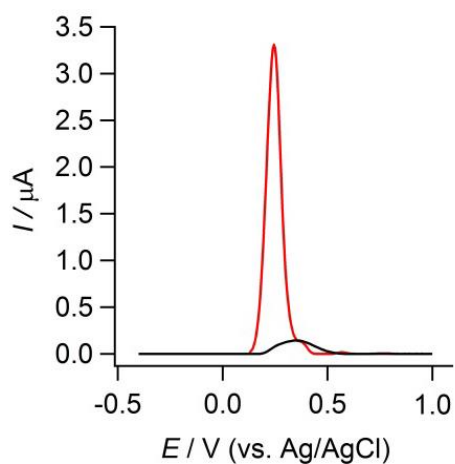

**Fig. S12** DPV responses of SNM/GCE (red line) and GCE (black line) in HB (diluted 100 times by 0.01 M PBS at pH 6.0) containing 40  $\mu\text{M}$  DA.

## S10. Analytical data compared with previous works

**Table S1** summarizes analytical data obtained with different forms of SNM modified electrodes for detecting Cu<sup>2+</sup> and DA.

**Table S1** Analytical data for the detection of Cu<sup>2+</sup> and DA using different SNM modified electrodes

| Electrode                                                    | Targets          | Method | Potential                                                                | Sensitivity                                                  | LOD                       | Linear Range                           | Ref              |
|--------------------------------------------------------------|------------------|--------|--------------------------------------------------------------------------|--------------------------------------------------------------|---------------------------|----------------------------------------|------------------|
| SNM/GCE                                                      | Cu <sup>2+</sup> | DPV    | 0.0 V                                                                    | 510 $\mu\text{A}/\mu\text{M}$ (0.2 nM ~ 1.0 nM)              | 131 pM                    | 200 pM ~ 25 $\mu\text{M}$              | <b>This work</b> |
|                                                              |                  |        |                                                                          | 0.047 $\mu\text{A}/\mu\text{M}$ (1.0 nM ~ 25 $\mu\text{M}$ ) |                           |                                        |                  |
|                                                              | DA               | 0.23 V | 0.51 $\mu\text{A}/\mu\text{M}$ (10 nM ~ 0.8 $\mu\text{M}$ )              | 7.8 nM                                                       | 10 nM ~ 100 $\mu\text{M}$ |                                        |                  |
|                                                              |                  |        | 0.064 $\mu\text{A}/\mu\text{M}$ (0.8 $\mu\text{M}$ ~ 100 $\mu\text{M}$ ) |                                                              |                           |                                        |                  |
| DA                                                           | ECL              | –      | 24200 $\mu\text{M}^{-1}$ (5 nM ~ 50 nM)                                  | 0.21 nM                                                      | 5 nM ~ 3 $\mu\text{M}$    |                                        |                  |
| SNM/ITO                                                      | Cu <sup>2+</sup> | DPV    | –0.1 V                                                                   | –                                                            | 20 nM                     | 100 nM ~ 30 $\mu\text{M}$              | Ref. s2          |
| DNAzyme-based molecular gate modified SNM/ITO                | Cu <sup>2+</sup> | SWV    | –                                                                        | 0.2 $\mu\text{A}/\mu\text{M}$                                | 3.9 $\mu\text{M}$         | 4.8 $\mu\text{M}$ ~ 70.2 $\mu\text{M}$ | Ref. s3          |
| Amine-functionalized SNM coated gold compact disk electrodes | Cu <sup>2+</sup> | ASDPV  | 0.4 V                                                                    | –                                                            | 40 nM                     | 0.1 ~ 10 $\mu\text{M}$                 | Ref. s4          |
| SNM/ITO                                                      | DA               | DPV    | 1.1 V                                                                    | 0.03 $\mu\text{A}/\mu\text{M}$                               | 9 $\mu\text{M}$           | 20 $\mu\text{M}$ ~ 226 $\mu\text{M}$   | Ref. s5          |
| Amine-functionalised SNM modified Carbon Paste Electrodes    | Cu <sup>2+</sup> | ASV    | 0.1 V                                                                    | –                                                            | –                         | –                                      | Ref. s6          |
| SNM Carbon Paste Electrode                                   | Cu <sup>2+</sup> | SWV    | 0.1 V                                                                    | –                                                            | 2 nM                      | 5 nM ~ 5 $\mu\text{M}$                 | Ref. s7          |

## References

- s1 T. Nasir, L. Zhang, N. Vila, G. Herzog and A. Walcarius, *Langmuir*, 2016, **32**, 4323-4332.
- s2 B. Cheng, L. Zhou, L. Lu, J. Liu, X. Dong, F. Xi and P. Chen, *Sens. Actuators, B*, 2018, **259**, 364-371.
- s3 M. Saadaoui, I. Fernández, A. Sánchez, P. Díez, S. Campuzano, N. Raouafi, J. M. Pingarrón and R. Villalonga, *Electrochem. Commun.*, 2015, **58**, 57-61.
- s4 A. Walcarius and E. Sibottier, *Electroanalysis*, 2005, **17**, 1716-1726.
- s5 W. Li, L. Ding, Q. Wang and B. Su, *Analyst*, 2014, **139**, 3926-3931.
- s6 S. Sayen and A. Walcarius, *J. Electroanal. Chem.*, 2005, **581**, 70-78.
- s7 A. Walcarius and J. Bessiere, *Electroanalysis*, 1997, **9**, 707-713.
